# Supplementary material
Source: publisher figshare collection journal article supplement (https://gsapubs.figshare.com/articles/dataset/_/12542474)

Jian-Gang Wang, Xiumian Hu, Eduardo Garzanti, Marcelle K. BouDagher-Fadel, Zhi-Chao Liu, Juan Li, and Fu-Yuan Wu, 2020, From extension to tectonic inversion: Mid-Cretaceous onset of Andean-type orogeny in the Lhasa block and early topographic growth of Tibet: GSA Bulletin, <https://doi.org/10.1130/B35314.1>.

## Data Repository

**Figure DR1.** Basaltic sill in the Shexing Formation. Cross-cutting relationship and Chilled margins indicate that these basaltic rocks are intrusive rather than volcanic.

**Table DR1.** Youngest detrital-zircon U–Pb ages of sandstone samples from the Shexing Formation.

**Table DR2.** Stratigraphic data for calculation of tectonic subsidence.

**Table DR3.** Petrographic composition of sandstones from the Shexing Formation.

**Table DR4.** U–Pb ages of detrital zircons from sandstones of the Shexing Formation.

**Table DR5.** Hf isotopic data of detrital zircons from sandstones of the Shexing Formation.

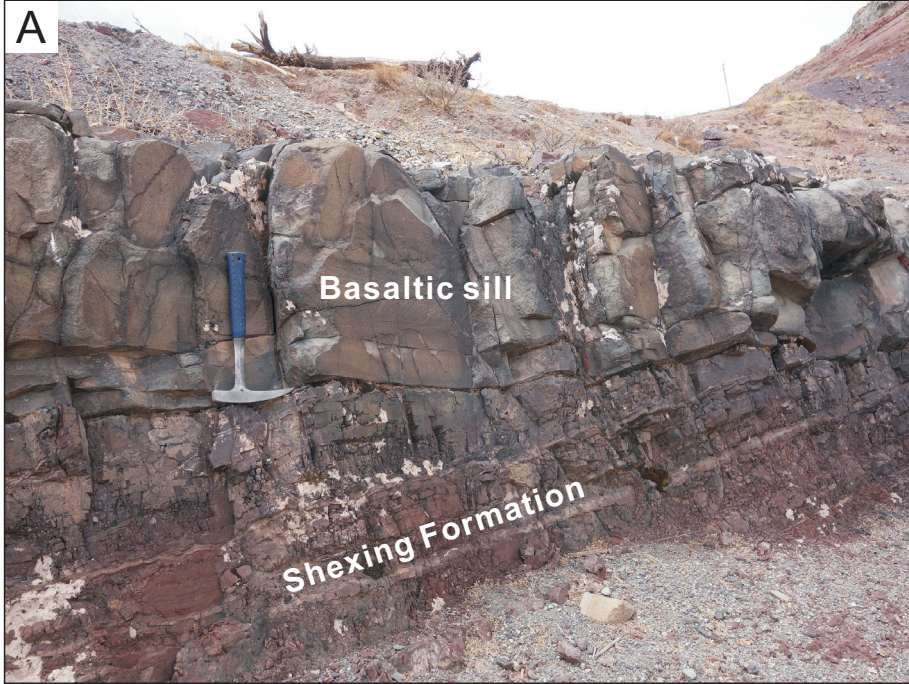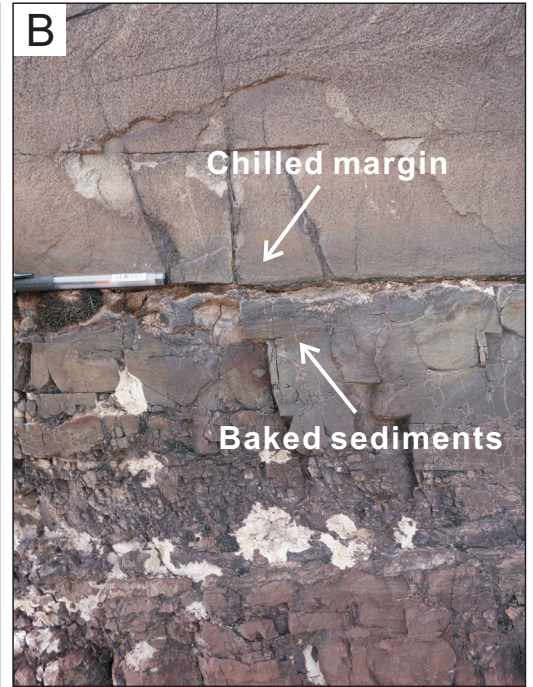

Supplement: Supplementary file 1 [file 1]
